# Supplementary material for: Structural and Thermodynamic Basis of Epitope Binding by Neutralizing and Nonneutralizing Forms of the Anti-HIV-1 Antibody 4E10
Source: PubMed Central journal article supplement — J Virol. 2015 Sep 16;89(23):11975–89. doi: 10.1128/JVI.01793-15 (PMC4645341; doi:10.1128/jvi.01793-15), 2015-09-16
Supplement: JVI.01793-15_zjv999090999so1.pdf [file JVI.01793-15_zjv999090999so1.pdf]

**Supplemental Material**

**STRUCTURAL AND THERMODYNAMIC BASIS OF EPITOPE  
BINDING BY NEUTRALIZING AND NON-NEUTRALIZING  
FORMS OF THE ANTI-HIV-1 ANTIBODY 4E10**

Eduarne Rujas<sup>a,b</sup>, Naveed Gulzar<sup>c</sup>, Koldo Morante<sup>a</sup>, Kouhei Tsumoto<sup>a</sup>, Jamie K.  
Scott<sup>c,d</sup>, José L. Nieva<sup>b#</sup>, and Jose M.M. Caaveiro<sup>a#</sup>

Running Title: Neutralizing vs. non-neutralizing anti-HIV antibodies

#Address correspondence to Jose M.M. Caaveiro, jose@bioeng.t.u-tokyo.ac.jp, or to Jose L.  
Nieva, joseluis.nieva@ehu.es

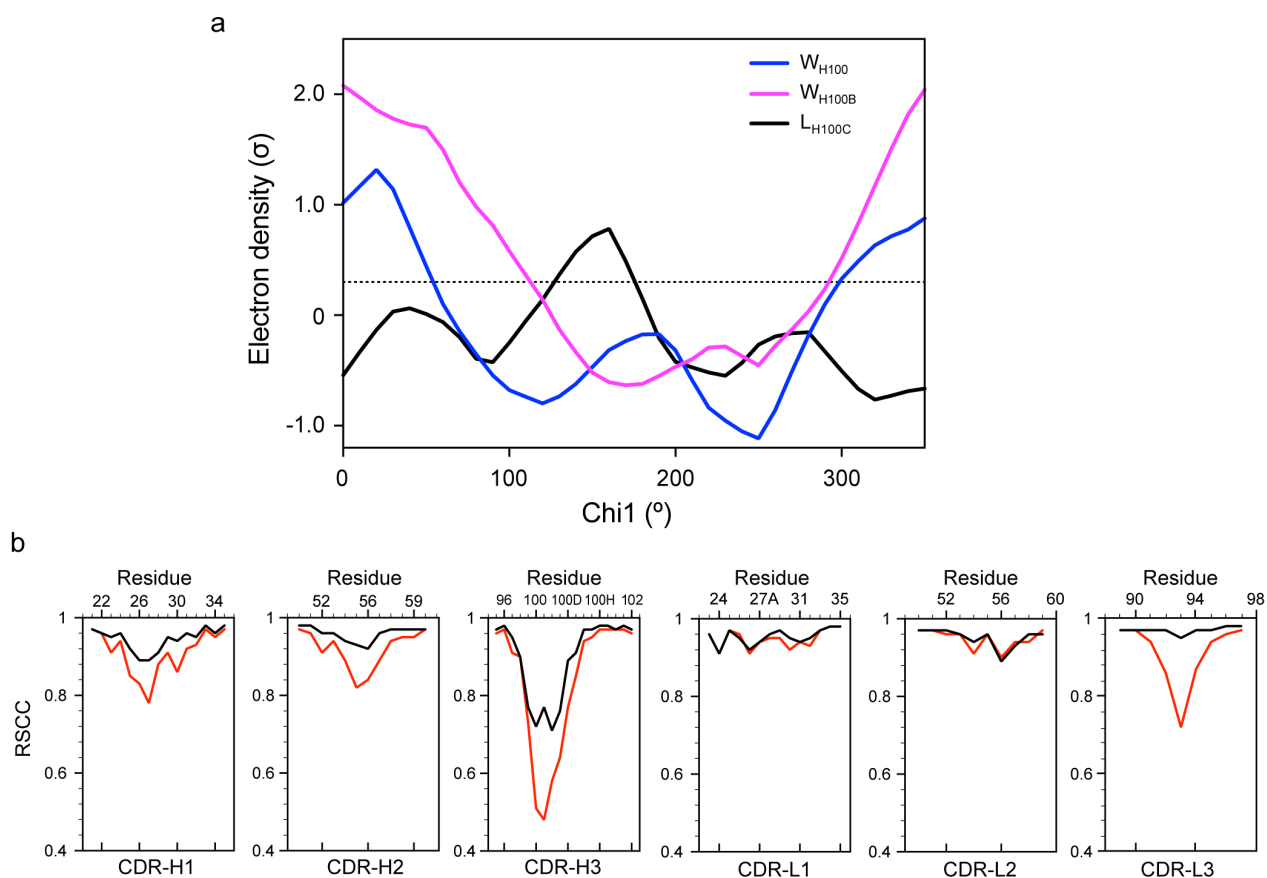

**FIG S1. Analysis of residues of the apex region of CDR-H3.** (A) Rotamer plot of residues of the CDR-H3 apex of the ligand-free form of 4E10 Fab calculated with RINGER. Values of Chi1 angle for residues  $W_{H100}$  (blue),  $W_{H100B}$  (magenta) and  $L_{H100C}$  (black) of chain H are shown. The dotted line corresponds to the electron density cut-off ( $\sigma = 0.3$ ). (B) Comparison of RSCC between unbound Fab (red lines, also shown in Figure 5c) and the arithmetic average RSCC of six crystal structures of 4E10 Fab with various types of peptide bound (black lines). The PDB entry codes of the crystal structures employed to prepare these plots were 1TZG (short peptide epitope), 2FX7 (4E10ep), 2FX8 (peptide constrained with a  $\alpha$ -amino isobutyric acid), 2FX9 (peptide with a thioether intramolecular bond), 4NHC (stapled peptide), and 4NGH (stapled peptide with a phosphate tether).

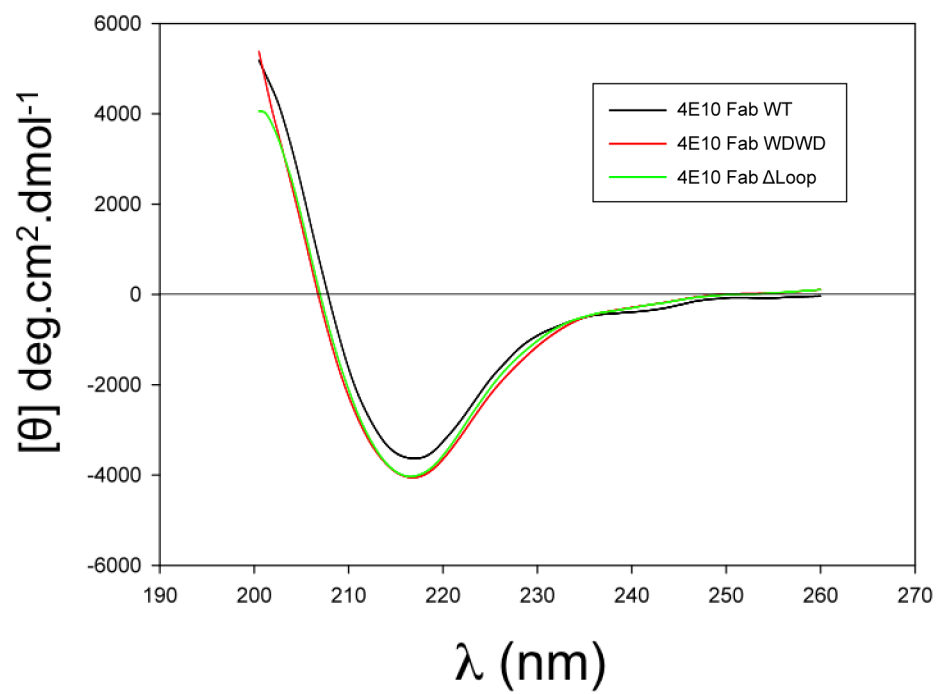

**FIG S2. Secondary structure.** CD spectra of WT (black), WDWD (red) and  $\Delta$ Loop (green) in the unbound form. Measurements were done in PBS at 25 °C. Fab concentration was 30  $\mu\text{M}$  in all samples.

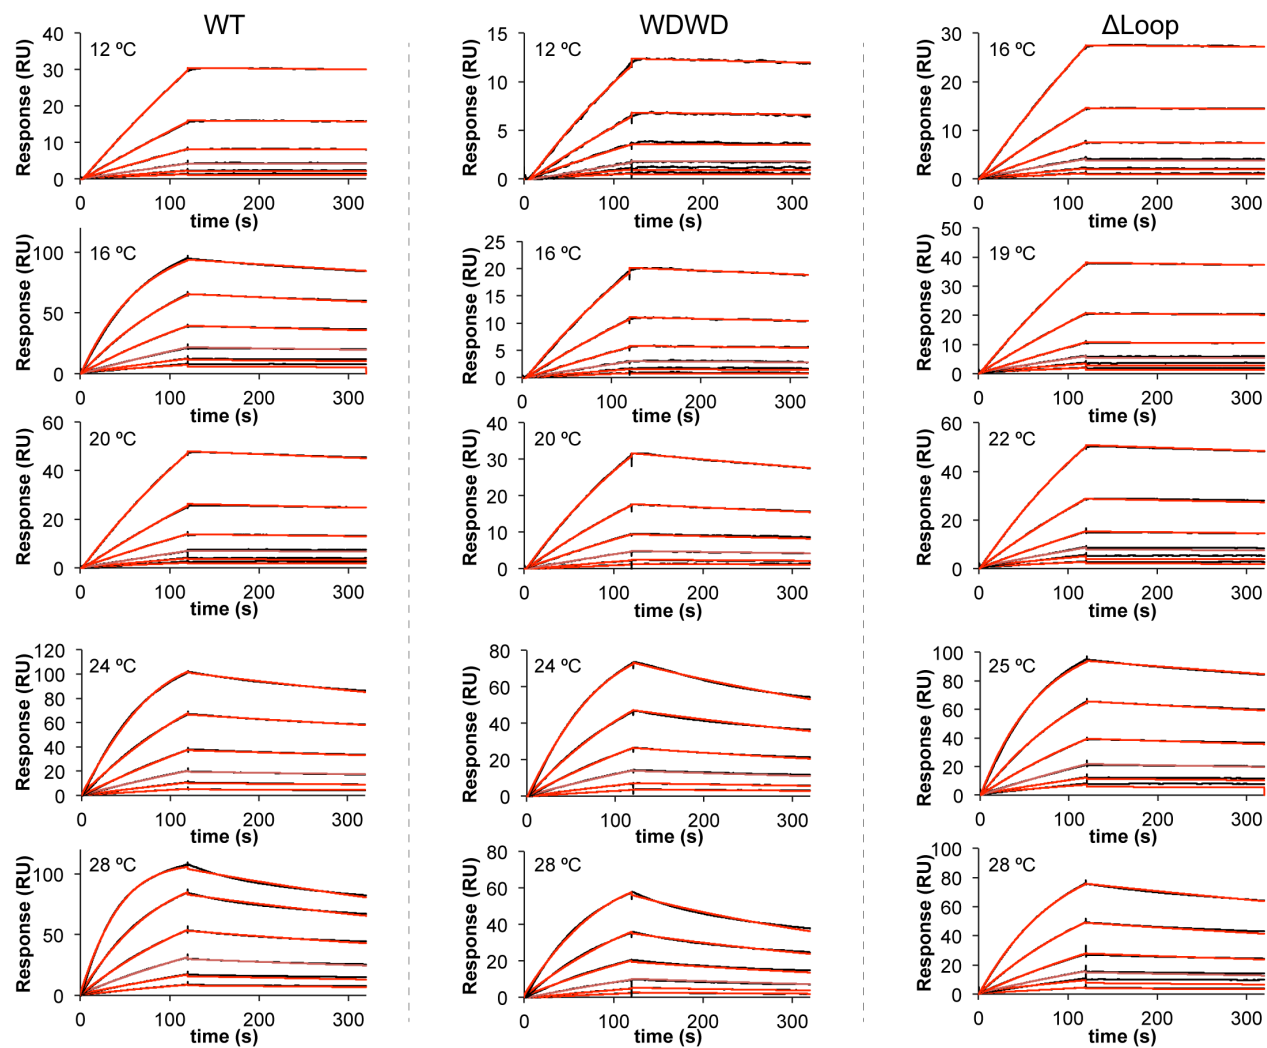

**FIG S3. Temperature dependence of binding of peptide to Fabs determined by SPR.** Data correspond to WT Fab (left), WDWD (center) and  $\Delta$ Loop (right). Temperatures are indicated in each panel. Experimental data (black) and best fit (red) are shown. In these experiments the peptide is flowed into a chip decorated with Fab. Prior to the injection of peptide, the Fab was captured by an anti-Fab antibody immobilized on a CM5 chip.

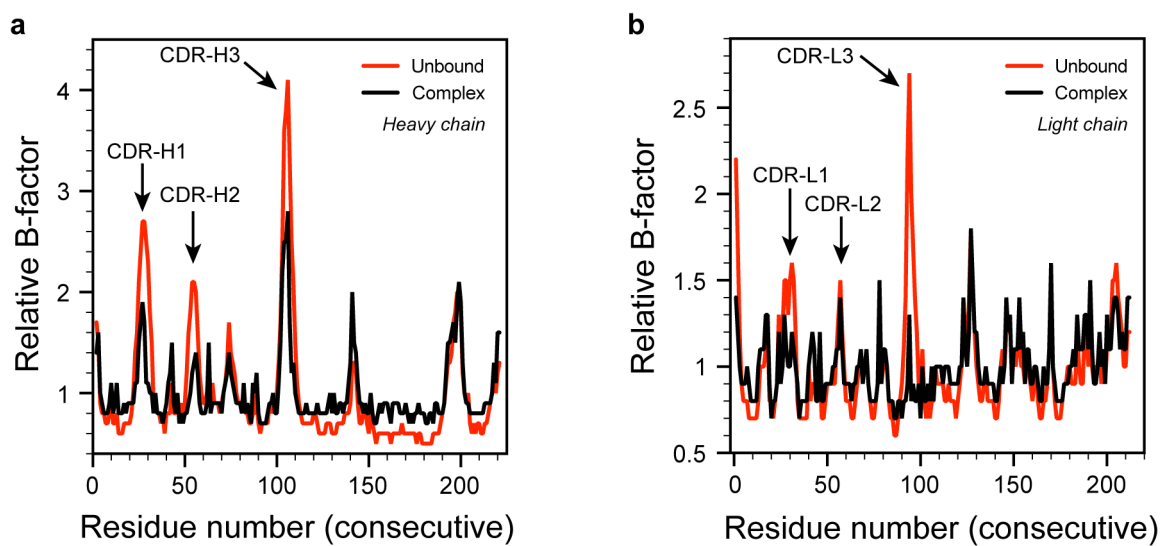

**Fig. S4. Crystallographic B-factors of Fab in the bound and unbound state. (A) Heavy chain. (B) Light-chain.** Relative B-factors are plotted to facilitate the comparison between crystal structures at different resolutions and quality. The relative B-factors were obtained by normalization with respect to the average B-factor of each structure.

**Table S1. Hydrogen bonds between 4E10 and 4E10ep.**

| Residue1               | Residue 2  | WT                        | WDWD | $\Delta$ Loop |
|------------------------|------------|---------------------------|------|---------------|
|                        |            | Distance ( $\text{\AA}$ ) |      |               |
| H-Ile56                | Pep-Trp672 | 3.21                      | 3.23 | 3.32          |
| H-Glu95                | Pep-Thr676 | 2.50                      | 2.64 | 2.61          |
| H-Leu100C <sup>a</sup> | Pep-Trp680 | 3.30                      | 3.31 | 2.73          |
| L-Tyr91                | Pep-Asn671 | 2.93                      | 2.93 | 2.97          |
| L-Ser94                | Pep-Trp672 | 2.91                      | 2.91 | 2.96          |
| L-Ser94                | Pep-Asn671 | 3.30                      | 3.33 | 3.39          |
| L-Lys32                | Pep-Asp674 | 2.80                      | 2.81 | 2.77          |

<sup>a</sup>In  $\Delta$ Loop this residue corresponds to Gly100A.

**Table S2. Interaction surface between the light chain of 4E10 Fabs and 4E10ep.**

| Residue    | WT                                     | WDWD | $\Delta$ Loop |
|------------|----------------------------------------|------|---------------|
|            | Buried surface area ( $\text{\AA}^2$ ) |      |               |
| L-Asn30    | 9.2                                    | 11.9 | 11.4          |
| L-Lys32    | 28.6                                   | 29.8 | 27.7          |
| L-Gln89    | 3.8                                    | 3.7  | 4.0           |
| L-Tyr91    | 38.2                                   | 38.6 | 38.9          |
| L-Gly92    | 13.5                                   | 13.2 | 14.1          |
| L-Gln93    | 12.5                                   | 14.8 | 14.7          |
| L-Ser94    | 58.5                                   | 57.4 | 56.7          |
| L-Ser96    | 12.5                                   | 12.4 | 12.8          |
| Subtotal   | 177                                    | 182  | 180           |
| Pep-Asn671 | 62.9                                   | 64.4 | 60.9          |
| Pep-Trp672 | 22.3                                   | 22.3 | 23.4          |
| Pep-Phe673 | 80.1                                   | 79.5 | 79.5          |
| Pep-Asp674 | 32.9                                   | 34.1 | 34.1          |
| Subtotal   | 198                                    | 200  | 201           |
| TOTAL      | 375                                    | 382  | 381           |

**Table S3. Interaction surface between the heavy chain of 4E10 Fabs and 4E10ep.**

| Residue                | WT                                     | WDWD  | $\Delta$ Loop |
|------------------------|----------------------------------------|-------|---------------|
|                        | Buried surface area ( $\text{\AA}^2$ ) |       |               |
| H-Ser28                | 0                                      | 8.0   | 0             |
| H-Thr31                | 46.9                                   | 51.3  | 44.6          |
| H-Tyr32                | 6.2                                    | 7.1   | 2.9           |
| H-Ala33                | 25.5                                   | 24.2  | 25.7          |
| H-Leu34                | 0                                      | 0.2   | 0.2           |
| H-Ser35                | 7.5                                    | 7.8   | 7.6           |
| H-Trp47                | 17.9                                   | 18.6  | 17.3          |
| H-Gly50                | 6.7                                    | 7.2   | 7.3           |
| H-Val51                | 1.8                                    | 2.2   | 2.0           |
| H-Ile52                | 56.9                                   | 59.1  | 56.9          |
| H-Leu53                | 35.4                                   | 9.0   | 34.9          |
| H-Leu54                | 30.0                                   | 34.5  | 32.2          |
| H-Ile56                | 26.4                                   | 27.9  | 27.2          |
| H-Thr57                | 0.4                                    | 0.7   | 0.5           |
| H-Asn58                | 53.7                                   | 53.7  | 52.7          |
| H-Glu95                | 13.6                                   | 13.2  | 13.1          |
| H-Leu100C <sup>a</sup> | 12.5                                   | 12.2  | 23.6          |
| H-Gly100D              | 7.4                                    | 7.4   | 6.7           |
| H-Lys100E              | 59.4                                   | 61.0  | 56.9          |
| H-Pro100F              | 55.4                                   | 55.8  | 57.8          |
| H-Gly100H              | 27.7                                   | 27.8  | 28.0          |
| H-Phe100J              | 13.1                                   | 12.8  | 13.7          |
| Subtotal               | 504                                    | 501   | 512           |
| Pep-Trp672             | 160.1                                  | 160.9 | 161.1         |
| Pep-Phe673             | 78.3                                   | 79.9  | 79.3          |
| Pep-Ile675             | 38.7                                   | 35.5  | 41.8          |
| Pep-Thr676             | 97.5                                   | 94.7  | 94.9          |
| Pep-Asn677             | 44.8                                   | 48.9  | 45.3          |
| Pep-Trp678             | 9.4                                    | 0     | 11.9          |
| Pep-Leu679             | 54.7                                   | 66.3  | 56.7          |
| Pep-Trp680             | 89.0                                   | 85.8  | 95.9          |
| Pep-Lys683             | 35.8                                   | 31.0  | 31.5          |
| Subtotal               | 608                                    | 603   | 618           |
| Total                  | 1,113                                  | 1,104 | 1,130         |

<sup>a</sup>In  $\Delta$ Loop this residue corresponds to Gly100A.
